# 1 TRPV4 is the temperature-sensitive ion channel of human sperm

2 Nadine Mundt<sup>1,2</sup>, Marc Spehr<sup>2</sup> and Polina V. Lishko<sup>1,@</sup>

3

4 <sup>1</sup> Department of Molecular and Cell Biology, University of California, Berkeley, CA 94720, USA

5 <sup>2</sup> Department of Chemosensation, Institute for Biology II, RWTH Aachen University, D-52074 Aachen,  
6 Germany

7

8 @ corresponding author Polina Lishko <lishko@berkeley.edu>

9

## 10 **Keywords**

11 TRPV4, sperm ion channels, hyperactivation, cation channel, thermosensitivity

12

13

## 14 **Abstract**

15 Ion channels control sperm fertilizing ability by triggering hyperactivated motility, which  
16 is regulated by membrane potential, intracellular pH, and cytosolic calcium. Previous  
17 studies unraveled three essential ion channels that regulate these parameters: 1) the  
18 Ca<sup>2+</sup> channel CatSper, 2) the K<sup>+</sup> channel KSper, and 3) the H<sup>+</sup> channel Hv1. However,  
19 the molecular identity of an additional sperm Na<sup>+</sup> conductance that mediates initial  
20 membrane depolarization and, thus, triggers downstream signaling events is yet to be  
21 defined. Here, we functionally characterize DSper, the Depolarizing Channel of Sperm,  
22 as the temperature-activated channel TRPV4. It is functionally expressed at both mRNA  
23 and protein levels, while other temperature-sensitive TRPV channels are not functional  
24 in human sperm. DSper currents are activated by warm temperatures and mediate  
25 cation conductance, that shares a pharmacological profile reminiscent of TRPV4.  
26 Together, these results suggest that TRPV4 activation triggers initial membrane  
27 depolarization, facilitating both CatSper and Hv1 gating and, consequently, sperm  
28 hyperactivation.

29

30

31

## 32 Introduction

33           The ability of human spermatozoa to navigate the female reproductive tract and  
34 eventually locate and fertilize the egg is essential for reproduction [1]. To accomplish  
35 these goals, a spermatozoon must sense the environment and adapt its motility, which  
36 is controlled by ATP production and flagellar ion homeostasis [2]. Of vital importance is  
37 the transition from symmetrical basal tail bending into “hyperactivated motility” – an  
38 asymmetrical, high-amplitude, whip-like beating pattern of the flagellum - that enables  
39 sperm to overcome the egg’s protective vestments. The steroid hormone progesterone  
40 (P4) acts as a major trigger of hyperactivation[3], [4]. P4 is released by cumulus cells  
41 surrounding the egg [5] and causes a robust elevation of sperm cytoplasmic  $[Ca^{2+}]$  via  
42 the principal  $Ca^{2+}$  channel of sperm, CatSper ( $EC_{50}= 7.7 \pm 1.8$  nM) [6]–[8]. The steroid  
43 acts via its non-genomic receptor ABHD2, a serine hydrolase that, upon P4 binding,  
44 releases inhibition of CatSper [9]. The propagation of a  $Ca^{2+}$  wave produced from the  
45 opening of CatSper channels along the flagellum is a necessary milestone in the  
46 process of fertilization and initiates hyperactivated motility [10]. CatSper channels  
47 exhibit pronounced voltage-dependency (slope factor  $k \sim 20$  in humans) with half-  
48 maximal activation at  $V_{1/2 \text{ human}} = +70$  mV [6]. Given this unusually high  $V_{1/2}$ , only a small  
49 fraction of human CatSper channels are open at physiological negative resting  
50 membrane potentials. P4 has been shown to potentiate CatSper activity by shifting  $V_{1/2}$   
51 to more negative values ( $V_{1/2 \text{ human}} = +30$  mV with 500 nM P4 [6]). However, CatSper still  
52 requires both additional intracellular alkalization and significant membrane  
53 depolarization to function properly [2], [11]. The proton channel Hv1 was revealed as  
54 one of the regulators of intracellular pH ( $pH_i$ ) in human spermatozoa [11], [12]. By  
55 mediating unidirectional flow of protons to the extracellular environment, voltage-gated  
56 Hv1 represents a key component in the CatSper activation cascade, but it also induces  
57 membrane hyperpolarization by exporting positive charges out of the cell. Hv1 is also  
58 voltage-operated and requires membrane depolarization to be activated [11] Therefore,  
59 both CatSper and Hv1 must rely on yet unidentified depolarizing ion channels. P4 was  
60 shown to inhibit the  $K^+$  channel of human sperm KSper ( $IC_{50}=7.5 \pm 1.3$   $\mu$ M [13], [14])  
61 making KSper one of the potential origins for membrane depolarization. However,  
62 efficient KSper inhibition requires P4 concentrations in the  $\mu$ M range, which are only

63 present in close vicinity of the egg. Sperm hyperactivation, however, occurs in the  
64 oviduct, where P4 concentrations are not sufficient to block KSper [15]. Hence, the  
65 current model is missing a fourth member – the "Depolarizing Channel of Sperm"  
66 (DSper) [16]. Activation of this hypothetical DSper would induce long-lasting membrane  
67 depolarization and provide the necessary positive net charge influx for CatSper/Hv1  
68 activity. Despite its central role, the molecular identity of DSper yet remains elusive.

69 The goal of this work was to characterize DSper and resolve its molecular  
70 identity in human spermatozoa. Using whole-cell voltage-clamp measurements, we  
71 recorded a novel non-CatSper conductance in both capacitated and noncapacitated  
72 spermatozoa. This unidentified, nonselective cation conductance exhibited outward  
73 rectification and pronounced temperature sensitivity. Parallel patch-clamp and  $\text{Ca}^{2+}$   
74 imaging recordings demonstrated that the specific TRPV4 channel agonist RN1747  
75 potentiated both DSper currents and intracellular calcium levels. Based on  
76 electrophysiological, biochemical and immunocytochemical data, we thus conclude that  
77 the molecular correlate of DSper is TRPV4.

## 78 Results

### 79 *A novel non-CatSper conductance*

80 As many calcium channels, CatSper conducts monovalent ions, such as  $\text{Cs}^+$  and  $\text{Na}^+$  in  
81 the absence of divalent cations from the extracellular solution (divalent free; DVF) [17].  
82 CatSper is also permeable to  $\text{Ca}^{2+}$  and  $\text{Ba}^{2+}$ , but it cannot conduct  $\text{Mg}^{2+}$  (Fig. 1 – Suppl.  
83 Fig. 1). In presence of extracellular  $\text{Mg}^{2+}$  the CatSper pore is blocked, resulting in the  
84 inhibition of monovalent CatSper currents ( $I_{\text{CatSper}}$ ) (Suppl. Fig. 1).

85 In whole-cell voltage-clamp recordings from human ejaculated spermatozoa, we  
86 consistently observed residual currents when  $I_{\text{CatSper}}$  was blocked with 1 mM  
87 extracellular  $\text{Mg}^{2+}$  (Fig. 1 A, B).  $\text{Cs}^+$  inward currents elicited under DVF condition (black  
88 traces and bars) were larger than currents recorded in the presence of  $\text{Mg}^{2+}$  (red traces  
89 and bars) (Fig. 1 A-C). This phenomenon was observed in both noncapacitated and  
90 capacitated spermatozoa, respectively. Notably, capacitated cells generally showed  
91 increased current densities under both conditions (Fig. 1 C). The data suggested that

92 the remaining conductance is a novel non-CatSper conductance via the yet to be  
93 identified DSper ion channel. DSper currents were potentiated during capacitation (Fig.  
94 1 C) and exhibited outward rectification. Though, DSper current recorded from  
95 capacitated cells was notably less rectifying (Fig. 1 A, B). This DSper component is  
96 unlikely a remnant of an increased leak current, since the cells returned to their initial  
97 “baseline” current after returning to initial (HS) bath solution (Fig. 1 - Suppl. Fig. 2).  
98 Cation influx is the physiologically relevant entity to be analyzed, because it represents  
99 channel activity under physiological relevant conditions and ensures membrane  
100 depolarization. Therefore, from now on we analyzed DSper inward currents elicited by  
101 the change of membrane potential from 0 mV to -80 mV. To rule out ‘contamination’ of  
102 putative  $I_{DSper}$  with remaining  $I_{CatSper}$ , we next tested whether 1 mM  $Mg^{2+}$  is sufficient to  
103 completely block  $I_{CatSper}$  and selectively isolate DSper currents. The CatSper inhibitor  
104 NNC 55-0396 [6] did not elicit any significant inhibitory effect on  $I_{DSper}$  (Fig. 1 D-F),  
105 confirming efficient CatSper pore block by  $Mg^{2+}$ . These findings corroborate our  
106 hypothesis that a novel CatSper-independent cation conductance could provide  
107 additional depolarization under physiological conditions. To isolate  $I_{DSper}$ , we performed  
108 all following experiments in presence of both  $Mg^{2+}$  and NNC 55-0396.

#### 109 *DSper current exhibits temperature sensitivity*

110 We next aimed to investigate mechanism(s) of DSper activation mechanism. Previous  
111 work had focused on various DSper candidates, one being ATP-activated P2X  
112 channels. Navarro *et al.* showed functional expression of P2X2 in mouse spermatozoa  
113 [18]. However, human spermatozoa appear to be insensitive to extracellular ATP [19].  
114 De Toni *et al.* suggested that human spermatozoa perform thermotaxis mediated by a  
115 member of the thermosensitive transient receptor potential vanilloid channel family,  
116 TRPV1 [20] supporting their claim by immunocytochemistry and  $Ca^{2+}$  imaging. By  
117 contrast, Kumar *et al.* detected TRPV4 expression in human spermatozoa using  
118 immunocytochemistry [21], yet the channel localization was not flagellar. Since the  
119 functional expression of a thermosensitive TRPV isoform in human spermatozoa is  
120 currently under debate, and their cation permeability renders them DSper candidates,  
121 we investigated the impact of temperature on DSper activity. As shown in Figure 2 A-C,  
122 elevating temperature profoundly increased  $I_{DSper}$ . We observed a temperature-induced

123 potentiation of both inward and outward currents in noncapacitated, as well as  
124 capacitated spermatozoa. A temperature ramp from 23 °C to 37 °C potentiated  $I_{DSper}$   
125 inward currents by factors of  $2.7 \pm 0.5$  for noncapacitated cells and  $2.0 \pm 0.2$  for  
126 capacitated cells, respectively (Fig. 2 D). Half-maximal activation was achieved at  $T_{1/2} =$   
127 33 °C (noncapacitated) and  $T_{1/2} = 32$  °C (capacitated) (Fig. 2 D). Moreover, the  
128 temperature-induced potentiation effect was reversible for both noncapacitated and  
129 capacitated cells (Figure 2 E). We hence conclude that the observed phenomenon is not  
130 a temperature-induced loss of the seal and compromised membrane stability and that  
131 DSper is indeed temperature-activated.

### 132 *DSper conducts Na<sup>+</sup>*

133 Since Na<sup>+</sup> is the major permeant extracellular ion in the female reproductive tract ( $[Na^+]$   
134 = 140 – 150 mM [22]), Na<sup>+</sup> is a likely source for membrane depolarization. We therefore  
135 investigated whether DSper has the capacity to conduct Na<sup>+</sup>. As indicated in Figure 3A,  
136 a similar outward rectifying  $I_{DSper}$  was recorded when extracellular Cs<sup>+</sup> was replaced  
137 with equimolar concentrations of Na<sup>+</sup>.  $I_{DSper}$  inward Na<sup>+</sup> currents were entirely CatSper-  
138 independent, since NNC 55-0396 had no significant inhibitory effect (Fig. 3B, C). In  
139 presence of both 1 mM Mg<sup>2+</sup> and 1 μM NNC 55-0396,  $I_{DSper}$  was still reversibly activated  
140 by warm temperatures (Fig. 3 D, E) with a  $4.1 \pm 0.5$  -fold increase for inward currents  
141 from 22 °C to 37 °C. Half -maximum activation was at  $T_{1/2} = 32$  °C, comparable to  
142 previously analyzed values for temperature-activated Cs<sup>+</sup> currents. Together, these  
143 electrophysiological data indicate that DSper shares characteristic hallmarks with  
144 thermosensitive TRPV channels [23]. We thus proceeded to define which TRPV  
145 channel(s) is involved.

### 146 *DSper is represented by the cation channel TRPV4*

147 Based on the observed  $I_{DSper}$  temperature spectrum (Fig. 2D and 3E), candidate  
148 channels are TRPV3 and TRPV4 [24]. In addition, TRPV1 was previously proposed as  
149 a mediator of human sperm thermotaxis [20]. To discriminate between these channels,  
150 we tested potential effects of corresponding selective agonists – carvacrol [25], RN1747  
151 [26] and capsaicin [27]. Employing both electrophysiological and Ca<sup>2+</sup> imaging  
152 recordings, only the TRPV4 agonist RN1747 showed an effect. In detail, application of 1

153  $\mu\text{M}$  RN1747 ( $\text{EC}_{50} = 0.77 \mu\text{M}$  [26]) potentiated DSper inward and outward currents (Fig.  
154 4 A, B). Potentiation of DSper outward currents was more prominent than for DSper  
155 inward currents (factor  $1.42 \pm 0.17$  for inward currents, factor  $1.95 \pm 0.35$  for outward  
156 currents; Fig. 4 C). Yet, one can easily see an increase of the inward current noise  
157 factor that may indicate single-channel opening (Fig. 4B). Using  $\text{Ca}^{2+}$  imaging in fluo-  
158 4/AM-loaded sperm (Video 1, Video 2, Fig. 4), we next recorded fluorescence changes  
159 in the flagellar principle piece (Fig. 4D, top) while stimulating with  $1 \mu\text{M}$  RN1747.  
160 Application of the TRPV4 agonist resulted in a rise in cytosolic calcium levels, as  
161 indicated by Videos 1 & 2 and Figure 4 D (bottom, red trace). Notably, the observed  
162 increase in  $[\text{Ca}^{2+}]_i$  was CatSper-independent as assured by preincubation ( $\geq 1$  min) with  
163 and co-application of the irreversible CatSper inhibitor NNC 55-0396 (Fig. 4D, bottom).  
164 Application of NNC 55-0396 alone did serve as a negative control and had no effect on  
165 cytosolic calcium levels (Fig. 4 D, black trace). Furthermore, no effects were observed  
166 by  $1 \mu\text{M}$  and  $10 \mu\text{M}$  capsaicin ( $\text{EC}_{50} = 711.9 \text{ nM}$  [27]) or  $500 \mu\text{M}$  carvacrol ( $\text{EC}_{50} = 490$   
167  $\mu\text{M}$  [28]) (Fig. 4 - Suppl. Fig. 1). We therefore conclude that human spermatozoa do not  
168 express functional TRPV1 or TRPV3 channels. Instead, our results indicate that the  
169 temperature-activated cation channel TRPV4 is functionally expressed and likely  
170 provides membrane depolarization in human sperm.

171 Supporting our functional data, TRPV4 was additionally detected in human sperm on  
172 both mRNA and protein levels. Reverse transcriptase PCR performed with a full-length  
173 TRPV4 primer pair and mRNA isolated from swim-up purified spermatozoa (Fig. 4 -  
174 Suppl. Fig. 2 A) detected a band at the expected size but was absent in negative  
175 controls (no reverse transcriptase and no template). Sequencing the isolated PCR  
176 product of that specific band (dotted square), yielded the full-length sequence of TRPV4  
177 isoform A (2620 bp, 98 kDa, Q9ERZ8). Moreover, the presence of TRPV4 protein  
178 was confirmed by western blotting (Fig. 4 - Suppl. Fig. 2 B). Immunoreactive bands  
179 were detected at  $\sim 115$  kDa in extracts from human testicular tissue (1), capacitated (2)  
180 and noncapacitated (3) spermatozoa (Fig. 4 - Suppl. Fig. 2 B). Importantly, when  
181 TRPV4 was cloned from human sperm mRNA extracts and recombinantly expressed in  
182 HEK293 cells, a band of similar molecular weight was detected (Fig. 4 - Suppl. Fig. 2

183 C). Finally, immunostaining with anti-hTRPV4 specific antibodies (Fig. 4 - Suppl. Fig. 2  
184 D) yielded an immunopositive signal in the acrosome and flagellum.

## 185 Discussion

186 Sperm transition to hyperactivated motility is essential for fertilization. Hyperactivation  
187 provides the propulsion force required to penetrate through viscous luminal fluids of the  
188 female reproductive tract and protective vestments of the egg. The CatSper channel is a  
189 key player in the transition to hyperactivated motility [29]. However, proper CatSper  
190 function requires three concurrent activation mechanisms: 1) membrane depolarization  
191 [6], 2) intracellular alkalization via Hv1-mediated proton extrusion [11], and 3)  
192 abundance of progesterone [6], [7]. While the two latter mechanisms have been  
193 described in detail, the source of membrane depolarization remained puzzling.

194 In human spermatozoa,  $K^+$ ,  $Ca^{2+}$ ,  $Cl^-$ , and  $H^+$  conductances have been described [6],  
195 [11], [13], [14], [30], [31]. However, the  $Na^+$  conductance of sperm remained unknown.  
196 Upon ejaculation, mammalian spermatozoa are exposed to increased  $[Na^+]$  (~30 mM in  
197 cauda epididymis *versus* 100–150 mM in seminal plasma). In the female reproductive  
198 tract,  $Na^+$  levels are similar to those in serum (140–150 mM) [22], [32]. Hence,  $Na^+$  is  
199 ideally suited to provide a depolarizing charge upon sperm deposit into the female  
200 reproductive tract.

201 Here, we record a novel CatSper-independent cation conductance that exhibits outward  
202 rectification as well as potentiation upon capacitation. We propose that this novel  
203 conductance is carried by the hypothetical “Depolarizing Channel of Sperm” DSper and  
204 provides the necessary cation influx for membrane depolarization.  $I_{DSper}$  is activated by  
205 warm temperatures between 22 and 37°C (Fig. 2, 3 D-E) which makes the protein  
206 thermoresponsive to physiologically relevant temperatures (34.4°C in the epididymis  
207 [33], 37 °C body core temperature at the site of fertilization). Previous studies showed  
208 that capacitated rabbit and human sperm cells have an inherent temperature sensing  
209 ability [34], which could be an additional driving force to guide male gametes from the  
210 reservoir towards the warmer fertilization site. It is thus very likely, that human  
211 spermatozoa express a temperature-activated ion channel, which operates in the

212 described temperature range and enables thermotaxis. The temperature response  
213 profile of DSper conforms with previously reported temperature sensitivity of TRPV4  
214 [35], [36]. Moreover, we observed  $I_{\text{DSper}}$  potentiation as well as flagellar  $\text{Ca}^{2+}$  elevations  
215 by the selective TRPV4 agonist RN1747 (Fig. 4).

216 According to our model (Fig. 5), human spermatozoa are exposed to an increase in  
217 both temperature and  $[\text{Na}^+]$  upon ejaculation. TRPV4-mediated  $\text{Na}^+$  influx induces  
218 membrane depolarization, which in turn activates both Hv1 and CatSper.  $\text{H}^+$  efflux  
219 through Hv1 promotes intracellular alkalization and thus enhanced CatSper activation.  
220 Approaching the egg, sperm is exposed to P4 and the endocannabinoid anandamide  
221 (AEA), both secreted by cumulus cells. P4 binding to ABHD2 releases CatSper  
222 inhibition [9] while AEA was shown to activate Hv1 [11]. The resulting opening of  
223 CatSper generates a  $\text{Ca}^{2+}$  wave that propagates along the flagellum and serves as the  
224 trigger for hyperactivation. P4 not only potentiates CatSper, it also inhibits KSper-  
225 mediated hyperactivation, which gives the CatSper activation cascade an additional  
226 impulse [13].

227 Using a CatSper2-deficient infertile patient, no remaining cation current was recordable,  
228 when both Hv1 and KSper were blocked [37]. However, these recordings were  
229 performed in a condition where ATP was absent from the pipette solution. According to  
230 Phelps *et al.* intracellular ATP binding to the N-terminal ankyrin repeat domain of  
231 TRPV4 has a profound sensitizing effect [38]. Indeed, addition of 4 mM ATP to the  
232 pipette solution, allowed us to consistently record TRPV4 activity from fertile human  
233 sperm.

234 Our data suggests that TRPV4 activity is strongly increased upon capacitation. Since  
235 capacitation encompasses changes in the phosphorylation state of many proteins [39],  
236 and TRPV4 requires tyrosine phosphorylation to function properly [40], it is likely that  
237 TRPV4 phosphorylation is required. It would also explain, why only capacitated human  
238 spermatozoa appear to be thermotactically responsive [34]. Interestingly, we also  
239 observed different  $I_{\text{DSper}}$  kinetics (i.e., less outward rectification) after capacitation. This  
240 finding could also be the result of phosphorylation, modified lipid composition or even



241 formation of TRPV4/X heteromers upon capacitation. These aspects will be addressed  
242 in future studies.

243 Selective anti-hTRPV4 antibodies located TRPV4 at the flagellum and acrosome of  
244 human sperm (Fig. 4 – Suppl. Fig. 2 D). The localization of TRPV4 in the acrosome  
245 region should be evaluated critically, since this compartment is highly antigenic and  
246 attracts antibodies in general [41]. However, TRPV4 appears to be distributed in the  
247 sperm flagellum. The principal piece of the sperm tail is also the compartment where  
248 CatSper and Hv1 reside [6], [11], bringing those three interdependent ion channels in  
249 close proximity to each other.

250 TRPV4 – more precisely its hyperfunction - might underlie the aversive effect of  
251 increased scrotal temperatures on sperm production and epididymal preservation. As  
252 proposed by Bedford *et al.*, increased scrotal temperatures when clothed contribute  
253 substantially to the inferior quality of human ejaculate [42]. By contrast, TRPV4 might  
254 represent an attractive target for male fertility control, since TRPV4 is likely to lie  
255 upstream in the signaling cascades leading to sperm hyperactivation and can be  
256 heterologously expressed for high-throughput functional studies.

257

## 258 Materials and methods

### 259 *Human sperm cells.*

260 A total of 3 healthy male volunteers were recruited to this study, which was conducted  
261 with approval of the Committee on Human Research at the University of California,  
262 Berkeley (protocol 10-01747, IRB reliance #151). Informed consent was obtained from  
263 all participants. Ejaculates were obtained by masturbation and spermatozoa were  
264 purified following the swim-up protocol as previously described [6]. In-vitro capacitation  
265 was accomplished by 4-hour incubation in 20 % Fetal bovine serum, 25 mM NaHCO<sub>3</sub> in  
266 HTF buffer [11] at 37 °C and 5 % CO<sub>2</sub>.

### 267 *Reagents*

268 NNC 55-0396 and RN 1747 was purchased from Tocris Bioscience (Bristol, UK),  
269 capsaicin from Cayman Chemical (Ann Arbor, USA), fluo-4/AM is from Invitrogen

270 (Thermo Fisher Scientific, Carlsbad, USA) and all other compounds were obtained from  
271 Sigma (St. Louis, USA).

272

273

## 274 *Electrophysiology*

275 For electrophysiological recordings, only the ultra-pure upper 1 ml of the swim-up  
276 fraction was used. Single cells were visualized with an inverse microscope (Olympus  
277 IX71) equipped with a differential interference contrast, a 60 x Objective (Olympus  
278 UPlanSApo, water immersion, 1.2 NA,  $\infty/0.13-0.21/FN26.5$ ) and a 1.6 magnification  
279 changer. An AXOPATCH 200B amplifier and an Axon™ Digidata 1550A digitizer (both  
280 Molecular Devices, Sunnydale, CA, USA) with integrated Humbug noise eliminator was  
281 used for data acquisition. Hardware was controlled with the Clampex 10.5 software  
282 (Molecular Devices). We monitored and compensated offset voltages and pipette  
283 capacitance ( $C_{fast}$ ). Gigaohm seals were established at the cytoplasmic droplet of highly  
284 motile cells in standard high saline buffer (“HS” in mM: 135 NaCl, 20 HEPES, 10 lactic  
285 acid, 5 glucose, 5 KCl, 2 CaCl<sub>2</sub>, 1 MgSO<sub>4</sub>, 1 sodium pyruvate, pH 7.4 adjusted with  
286 NaOH, 320 mOsm/l) [43], [17]. The patch pipette was filled with 140 mM CsMeSO<sub>3</sub>, 20  
287 mM HEPES, 10 mM BAPTA, 4 mM NaATP, 1 mM CsCl (pH 7.4 adjusted with CsOH,  
288 330 mOsm/l). For recordings from capacitated spermatozoa, BAPTA was substituted for  
289 5 mM EGTA and 1 mM EDTA. Transition into whole-cell mode was achieved by  
290 applying voltage pulses (499–700 mV, 1-5 ms,  $V_{hold} = 0$  mV) and simultaneous suction.  
291 After establishment of the whole-cell configuration, inward and outward currents were  
292 elicited via 0.2 Hz stimulation with voltage ramps (-80 mV to +80 mV in 850 ms,  $V_{hold} = 0$   
293 mV, total 1000 ms/ramp). Data was not corrected for liquid junction potential changes.  
294 To ensure stable recording conditions, only cells with baseline currents (in HS solution)  
295  $\leq 10$  pA at -80 mV were used for experiments. Under “HS” condition, CatSper and  
296 DSper currents were considered to be minimal, thus any remaining baseline current  
297 represented the cells leak current. During whole-cell voltage-clamp experiments, the  
298 cells were continuously superfused with varying bath solutions utilizing a gravity-driven

299 perfusion system. If not stated otherwise, electrophysiological experiments were  
300 performed at 22°C. Temperature of the bath solution was controlled and monitored with  
301 an automatic temperature control (TC-324B, Warner Instrument Corporation, Hamden,  
302 CT, USA). Both, CatSper and Dsper currents were recorded under symmetric  
303 conditions for the major permeant ion. Under these conditions, the bath solution was  
304 divalent free (“DVF”) containing (in mM) 140 CsMeSO<sub>3</sub>, 20 HEPES, 1 EDTA, and pH  
305 7.4 was adjusted with CsOH, 320 mOsm/l. To isolate Dsper conductances, monovalent  
306 currents through CatSper channels were inhibited by supplementing the DVF solution  
307 with 1 mM Mg<sup>2+</sup> [6]. Experiments with different bath solutions were performed on the  
308 same sperm cell. Signals were sampled at 10 kHz and low-pass filtered at 1 kHz  
309 (Bessel filter; 80 dB/decade). Pipette resistance ranged from 9 – 15 MΩ, access  
310 resistance was 21–100 MΩ, membrane resistance ≥ 1.5 GΩ. Membrane capacitance  
311 was 0.8-1.3 pF and served as a proxy for the cell surface area and thus for  
312 normalization of current amplitudes (i.e., current density). Capacitance artifacts were  
313 graphically removed. Statistical analysis was done with Clampfit 10.3 (Molecular  
314 Devices, Sunnyvale, CA, USA), OriginPro 8.6 (OriginLab Corp., Northampton, MA,  
315 USA) and Microsoft Excel 2016 (Redmond, WA, USA). Statistical data are presented as  
316 mean ± standard error of the mean (SEM), and (n) indicates the number of recorded  
317 cells. Statistical significance was determined with unpaired t-tests.

### 318 *Calcium Imaging*

319 All calcium imaging experiments were performed in HS solution. Prior to fluorescence  
320 recording, swim-up purified human spermatozoa [29] were bulk loaded with 9 μM fluo-  
321 4/AM (dissolved in DMSO) and 0.05% Pluronic (dissolved in DMSO) in HS solution for  
322 30 min at room temperature. Cells were then washed with dye-free HS solution and  
323 allowed to adhere to glass imaging chambers (World Precision Instruments, Sarasota,  
324 USA) for 1 min. Via continuous bath perfusion, the attached spermatozoa were  
325 presented with alternating extracellular conditions (HS +/- agonist/antagonist).  
326 Fluorescence was recorded at 1 Hz, 100 ms exposure time over a total time frame as  
327 indicated. Imaging was performed using a Spectra X light engine (Lumencore,  
328 Beaverton, USA) and a Hamamatsu ORCA-ER CCD camera. Fluorescence change  
329 over time was determined as  $\Delta F/F_0$  where  $\Delta F$  is the change in fluorescence intensity (F

330 -  $F_0$ ) and  $F_0$  is the baseline intensity as calculated by averaging the fluorescence signal  
331 of the first 20 s in HS solution. Regions of interest (ROI) were restricted to the flagellar  
332 principal piece of each cell by manual selection in ImageJ (Java, Redwood Shores, CA,  
333 USA). It should be noted that only a fraction of cells responded to RN1747 stimulation,  
334 reflecting the heterogeneity of the human sperm pool. Only responsive cells were  
335 considered for statistical analysis. However, 0 % of the imaged cells, showed a  
336 response to carvacrol or capsaicin. Statistical data are presented as mean  $\pm$  standard  
337 error of the mean (SEM), and (n) indicates the number of recorded cells.

### 338 *Immunocytochemistry*

339 Purified spermatozoa were plated onto 20-mm coverslips in HS and allowed to attach  
340 for 20 min. The cells were fixed with 4% paraformaldehyde (PFA) in PBS for 20 min and  
341 washed twice with PBS. Additional fixation was performed with 100% ice-cold methanol  
342 for 1 min with two washing steps in PBS. Cells were blocked and permeabilized by 1-  
343 hour incubation in PBS supplemented with 5 % immunoglobulin- $\gamma$  (IgG)-free BSA and  
344 0.1 % Triton X-100. Immunostaining was performed in the same blocking solution. Cells  
345 were incubated with primary antibodies (rabbit polyclonal  $\alpha$ TRPV4, 1:100, abcam  
346 ab39260) overnight at 4°C. After extensive washing in PBS, secondary antibodies  
347 (mouse monoclonal  $\alpha$ Rabbit-DyLight™488, 1:1000, Jackson 211-482-171) were added  
348 for 45 min at room temperature. After vigorous washing, cells were mounted with  
349 ProLong Gold Antifade with DAPI reagent (Life Technologies, Carlsbad, CA) and  
350 imaged with a confocal microscope.

### 351 *RT-PCR and cloning*

352 Total donor-specific RNA was extracted from purified spermatozoa with a QIAGEN  
353 RNAeasy mini kit followed by complementary DNA synthesis with a Phusion RT-PCR kit  
354 (Finnzymes, MA, USA). The donor-specific translated region of TRPV4 (cDNA) was  
355 amplified with the primers forward 5'- ACAGATATCACCATGGCGGATTCCAGCG -3'  
356 and reverse 5'-AACACAGCGGCCGCCTAGAGCGGGGCGTCATC-3', and was  
357 subcloned into a pTracer-CMV2 vector (Invitrogen) using the restriction sites: EcoR V  
358 and Not I. TRPV4 identity was sequence verified.

### 359 *Immunoblotting*

360 The highly motile sperm fraction was separated from other somatic cells (mainly white  
361 blood cells, immature germ cells, and epithelial cells) by density gradient consisting of  
362 90% and 50% isotonic Isolate (Irvine Scientific, CA) solution diluted in HS solution with  
363 the addition of protease inhibitors (Roche). Protease inhibitors were used throughout  
364 the whole procedure. After centrifugation at 300 g for 30 min at 24°C, the sperm pellet at  
365 the bottom of the 90% layer was collected, diluted ten times, and washed in HS by  
366 centrifugation at 2000 g for 20 min. Cells were examined by phase-contrast microscopy  
367 for motility and counted before centrifugation. Contamination of the pure sperm fraction  
368 by other cell types was minimal, with less than 0.2% of somatic cells, which was below  
369 the protein detection threshold for immunoblotting applications. The pellet was  
370 subjected to osmotic shock by a 5 min incubation in 0.5x HS solution, the addition of 10  
371 mM EDTA and 10mM dithiothreitol (DTT) for 10 min, and sonication in a water bath at  
372 25 °C for 5 min. Osmolarity was adjusted by addition of 10x phosphate-buffered saline  
373 (PBS). Laemmli sample buffer (5x) was added to a final 1x concentration, and the DTT  
374 concentration was adjusted to 20 mM. An additional 5 min sonication and boiling at  
375 100 °C for 5 min were performed. The total crude cell lysate was loaded onto a 4%–  
376 20% gradient Tris-HCl Criterion SDS-PAGE (BioRad) with 500,000 sperm cells/well.  
377 TRPV4- and empty vector-transfected HEK293 cells were lysed in 2x Laemmli sample  
378 buffer and subjected to SDS-PAGE. Ten thousand cells per well were loaded onto SDS-  
379 PAGE. After transfer to polyvinylidene fluoride membranes, blots were blocked in 0.1%  
380 PBS-Tween20 with 3% IgG-free BSA for 15 min and incubated with primary antibodies  
381 overnight at 4 °C. Blots were probed with rabbit anti- $\beta$ -tubulin antibodies (Abcam),  
382 mouse monoclonal anti-actin C4 antibodies (Abcam), or anti-TRPV4 antibodies  
383 (Abcam). After subsequent washing and incubation with secondary horseradish  
384 peroxidase-conjugated antibodies (Abcam), membranes were developed with an ECL  
385 SuperSignal West Pico kit (Pierce).

### 386 **Acknowledgements**

387 We thank Dr. Junji Suzuki (UCSF, CA) for the help with calcium imaging. We also  
388 thank Dr. Julio F. Cordero-Morales (University of Tennessee Health Science Center,

389 Memphis, TN) for the initial input and suggestions. M.S. is a Lichtenberg Professor of  
390 the Volkswagen Foundation and acknowledges support from the FENS-Kavli Network of  
391 Excellence. This work was supported by a DAAD fellowship to N.M., and by NIH  
392 R01GM111802, R21HD081403, Pew Biomedical Scholars Award, Alfred P. Sloan  
393 Award, and Packer Wentz Endowment Will to P.V.L.

#### 394 Competing interests

395 The authors declare that no competing interests exist.

## 396 References

- 397 [1] M. Okabe, “The cell biology of mammalian fertilization,” *Development*, vol. 140,  
398 no. 22, pp. 4471–4479, 2013.
- 399 [2] P. V. Lishko, Y. Kirichok, D. Ren, B. Navarro, J.-J. Chung, and D. E. Clapham,  
400 “The Control of Male Fertility by Spermatozoan Ion Channels,” *Annu. Rev.*  
401 *Physiol.*, vol. 74, no. 1, pp. 453–475, Mar. 2012.
- 402 [3] S. S. Suarez, “Control of hyperactivation in sperm.,” *Hum. Reprod. Update*, vol.  
403 14, no. 6, pp. 647–57.
- 404 [4] M. L. Uhler, A. Leung, S. Y. Chan, and C. Wang, “Direct effects of progesterone  
405 and antiprogesterone on human sperm hyperactivated motility and acrosome  
406 reaction.,” *Fertil. Steril.*, vol. 58, no. 6, pp. 1191–8, Dec. 1992.
- 407 [5] A. W. Schuetz and N. H. Dubin, “Progesterone and Prostaglandin Secretion by  
408 Ovulated Rat Cumulus Cell-Oocyte Complexes\*,” *Endocrinology*, vol. 108, no. 2,  
409 pp. 457–463, Feb. 1981.
- 410 [6] P. V Lishko, I. L. Botchkina, and Y. Kirichok, “Progesterone activates the principal  
411 Ca<sup>2+</sup> channel of human sperm.,” *Nature*, vol. 471, no. 7338, pp. 387–91, Mar.  
412 2011.
- 413 [7] T. Strünker *et al.*, “The CatSper channel mediates progesterone-induced Ca<sup>2+</sup>  
414 influx in human sperm.,” *Nature*, vol. 471, no. 7338, pp. 382–6, Mar. 2011.
- 415 [8] J. F. Smith *et al.*, “Disruption of the principal, progesterone-activated sperm Ca<sup>2+</sup>  
416 channel in a CatSper2-deficient infertile patient.,” *Proc. Natl. Acad. Sci. U. S. A.*,  
417 vol. 110, no. 17, pp. 6823–8, Apr. 2013.
- 418 [9] M. R. Miller *et al.*, “Unconventional endocannabinoid signaling governs sperm  
419 activation via sex hormone progesterone.,” *Science*, vol. 352, no. 6285, pp. 555–  
420 559, 2016.
- 421 [10] T. A. Quill, S. A. Sugden, K. L. Rossi, L. K. Doolittle, R. E. Hammer, and D. L.  
422 Garbers, “Hyperactivated sperm motility driven by CatSper2 is required for

- 423 fertilization.," *Proc. Natl. Acad. Sci. U. S. A.*, vol. 100, no. 25, pp. 14869–74, Dec.  
424 2003.
- 425 [11] P. V. Lishko, I. L. Botchkina, A. Fedorenko, and Y. Kirichok, "Acid Extrusion from  
426 Human Spermatozoa Is Mediated by Flagellar Voltage-Gated Proton Channel,"  
427 *Cell*, vol. 140, no. 3, pp. 327–337, Feb. 2010.
- 428 [12] T. K. Berger *et al.*, "Post-translational cleavage of Hv1 in human sperm tunes pH-  
429 and voltage-dependent gating," *J. Physiol.*, vol. 595, no. 5, pp. 1533–1546, Mar.  
430 2017.
- 431 [13] N. Mallowetz, N. M. Naidoo, S. A. S. Choo, J. F. Smith, and P. V. Lishko, "Slo1  
432 is the principal potassium channel of human spermatozoa," *Elife*, vol. 2, p.  
433 e01009, 2013.
- 434 [14] C. Brenker *et al.*, "The Ca<sup>2+</sup>-activated K<sup>+</sup> current of human sperm is mediated by  
435 Slo3," *Elife*, vol. 3, p. e01438, Mar. 2014.
- 436 [15] R. P. Demott and S. S. Suarez, "Hyperactivated sperm progress in the mouse  
437 oviduct.," *Biol. Reprod.*, vol. 46, no. 5, pp. 779–85, May 1992.
- 438 [16] M. R. Miller, S. A. Mansell, S. A. Meyers, and P. V. Lishko, "Flagellar ion channels  
439 of sperm: similarities and differences between species," *Cell Calcium*, vol. 58, no.  
440 1, 2015.
- 441 [17] Y. Kirichok, B. Navarro, and D. E. Clapham, "Whole-cell patch-clamp  
442 measurements of spermatozoa reveal an alkaline-activated Ca<sup>2+</sup> channel.,"  
443 *Nature*, vol. 439, no. 7077, pp. 737–40, Feb. 2006.
- 444 [18] B. Navarro, K. Miki, and D. E. Clapham, "ATP-activated P2X<sub>2</sub> current in mouse  
445 spermatozoa.," *Proc. Natl. Acad. Sci. U. S. A.*, vol. 108, no. 34, pp. 14342–7, Aug.  
446 2011.
- 447 [19] C. Brenker *et al.*, "The CatSper channel: a polymodal chemosensor in human  
448 sperm.," *EMBO J.*, vol. 31, no. 7, pp. 1654–65, Apr. 2012.
- 449 [20] L. De Toni *et al.*, "Heat sensing receptor TRPV1 is a mediator of thermotaxis in



- 450 human spermatozoa,” *PLoS One*, vol. 11, no. 12, pp. 1–18, 2016.
- 451 [21] A. Kumar *et al.*, “TRPV4 is endogenously expressed in vertebrate spermatozoa  
452 and regulates intracellular calcium in human sperm,” *Biochem. Biophys. Res.  
453 Commun.*, vol. 473, no. 4, pp. 781–788, 2016.
- 454 [22] R. M. Borland, J. D. Biggers, C. P. Lechene, and M. L. Taymor, “Elemental  
455 composition of fluid in the human Fallopian tube.,” *J. Reprod. Fertil.*, vol. 58, no. 2,  
456 pp. 479–82, Mar. 1980.
- 457 [23] M. G. Rosasco and S. E. Gordon, “TRP Channels: What Do They Look Like?,” in  
458 *Neurobiology of TRP Channels*, 2nd ed., Frontiers in Neuroscience, 2017.
- 459 [24] C. D. Benham, M. J. Gunthorpe, and J. B. Davis, “TRPV channels as temperature  
460 sensors,” *Cell Calcium*, vol. 33, no. 5–6, pp. 479–487, May 2003.
- 461 [25] A. K. Vogt-Eisele *et al.*, “Monoterpenoid agonists of TRPV3,” *Br. J. Pharmacol.*,  
462 vol. 151, no. 4, pp. 530–540, Jan. 2009.
- 463 [26] F. Vincent *et al.*, “Identification and characterization of novel TRPV4 modulators,”  
464 *Biochem. Biophys. Res. Commun.*, vol. 389, no. 3, pp. 490–494, Nov. 2009.
- 465 [27] D. Julius, M. J. Caterina, M. A. Schumacher, M. Tominaga, T. A. Rosen, and J. D.  
466 Levine, “The capsaicin receptor: a heat-activated ion channel in the pain  
467 pathway.,” *Nature*, vol. 389, no. 6653, pp. 816–824, Oct. 1997.
- 468 [28] A. K. Vogt-Eisele *et al.*, “Monoterpenoid agonists of TRPV3.,” *Br. J. Pharmacol.*,  
469 vol. 151, no. 4, pp. 530–40, Jun. 2007.
- 470 [29] H. Qi *et al.*, “All four CatSper ion channel proteins are required for male fertility  
471 and sperm cell hyperactivated motility,” *Proc. Natl. Acad. Sci.*, vol. 104, no. 4, pp.  
472 1219–1223, 2007.
- 473 [30] T. Strünker *et al.*, “The CatSper channel mediates progesterone-induced Ca<sup>2+</sup>  
474 influx in human sperm,” *Nature*, vol. 471, no. 7338, pp. 382–386, Mar. 2011.
- 475 [31] G. Orta, G. Ferreira, O. José, C. L. Treviño, C. Beltrán, and A. Darszon, “Human  
476 spermatozoa possess a calcium-dependent chloride channel that may participate

- 477 in the acrosomal reaction.,” *J. Physiol.*, vol. 590, no. 11, pp. 2659–75, Jun. 2012.
- 478 [32] G. W. Salisbury, “The Biochemistry of Semen and of the Male Reproductive Tract.  
479 Thaddeus Mann. Methuen, London; Wiley, New York, 1964. xxiv + 493 pp. Illus.  
480 \$16.50,” *Science (80-. )*, vol. 147, no. 3659, pp. 727–728, Feb. 1965.
- 481 [33] A. Valeri, D. Mianné, F. Merouze, L. Bujan, A. Altobelli, and J. Masson, “Scrotal  
482 temperature in 258 healthy men, randomly selected from a population of men  
483 aged 18 to 23 years old. Statistical analysis, epidemiologic observations, and  
484 measurement of the testicular diameters,” *Prog. Urol.*, vol. 3, no. 3, pp. 444–52,  
485 Jun. 1993.
- 486 [34] A. Bahat, I. Tur-Kaspa, A. Gakamsky, L. C. Giojalas, H. Breitbart, and M.  
487 Eisenbach, “Thermotaxis of mammalian sperm cells: A potential navigation  
488 mechanism in the female genital tract,” *Nat. Med.*, vol. 9, no. 2, pp. 1–2, 2003.
- 489 [35] H. Watanabe, J. Vriens, S. H. Suh, C. D. Benham, G. Droogmans, and B. Nilius,  
490 “Heat-evoked activation of TRPV4 channels in a HEK293 cell expression system  
491 and in native mouse aorta endothelial cells.,” *J. Biol. Chem.*, vol. 277, no. 49, pp.  
492 47044–51, Dec. 2002.
- 493 [36] A. D. Güler, H. Lee, T. Iida, I. Shimizu, M. Tominaga, and M. Caterina, “Heat-  
494 evoked activation of the ion channel, TRPV4.,” *J. Neurosci.*, vol. 22, no. 15, pp.  
495 6408–14, Aug. 2002.
- 496 [37] J. F. Smith *et al.*, “Disruption of the principal, progesterone-activated sperm Ca<sup>2+</sup>  
497 channel in a CatSper2-deficient infertile patient.,” *Proc. Natl. Acad. Sci. U. S. A.*,  
498 vol. 110, no. 17, pp. 6823–8, Apr. 2013.
- 499 [38] C. B. Phelps, R. R. Wang, S. S. Choo, and R. Gaudet, “Differential regulation of  
500 TRPV1, TRPV3, and TRPV4 sensitivity through a conserved binding site on the  
501 ankyrin repeat domain,” *J. Biol. Chem.*, vol. 285, no. 1, pp. 731–740, 2010.
- 502 [39] P. E. Visconti, D. Krapf, J. L. de la Vega-Beltrán, J. J. Acevedo, and A. Darszon,  
503 “Ion channels, phosphorylation and mammalian sperm capacitation,” *Asian J.*  
504 *Androl.*, vol. 13, no. 3, pp. 395–405, May 2011.

- 505 [40] T. Wegierski, U. Lewandrowski, B. Müller, A. Sickmann, and G. Walz, “Tyrosine  
506 phosphorylation modulates the activity of TRPV4 in response to defined stimuli,”  
507 *J. Biol. Chem.*, vol. 284, no. 5, pp. 2923–33, Jan. 2009.
- 508 [41] F.-P. Cheng, A. Fazeli, W. F. Voorhout, A. Marks, M. M. Bervers, and B.  
509 Colenbrander, “Use of Peanut Agglutinin to Assess the Acrosomal Status and the  
510 Zona Pellucida-Induced Acrosome Reaction in Stallion Spermatozoa,” *J. Androl.*,  
511 vol. 17, no. 6, 1996.
- 512 [42] J. Bedford, “Effects of elevated temperature on the epididymis and testis:  
513 experimental studies,” *Adv Exp Med Biol.*, vol. 286, pp. 19–32, 1991.
- 514 [43] P. Lishko, D. E. Clapham, B. Navarro, and Y. Kirichok, “Sperm patch-clamp,”  
515 *Methods Enzymol.*, vol. 525, pp. 59–83, 2013.
- 516

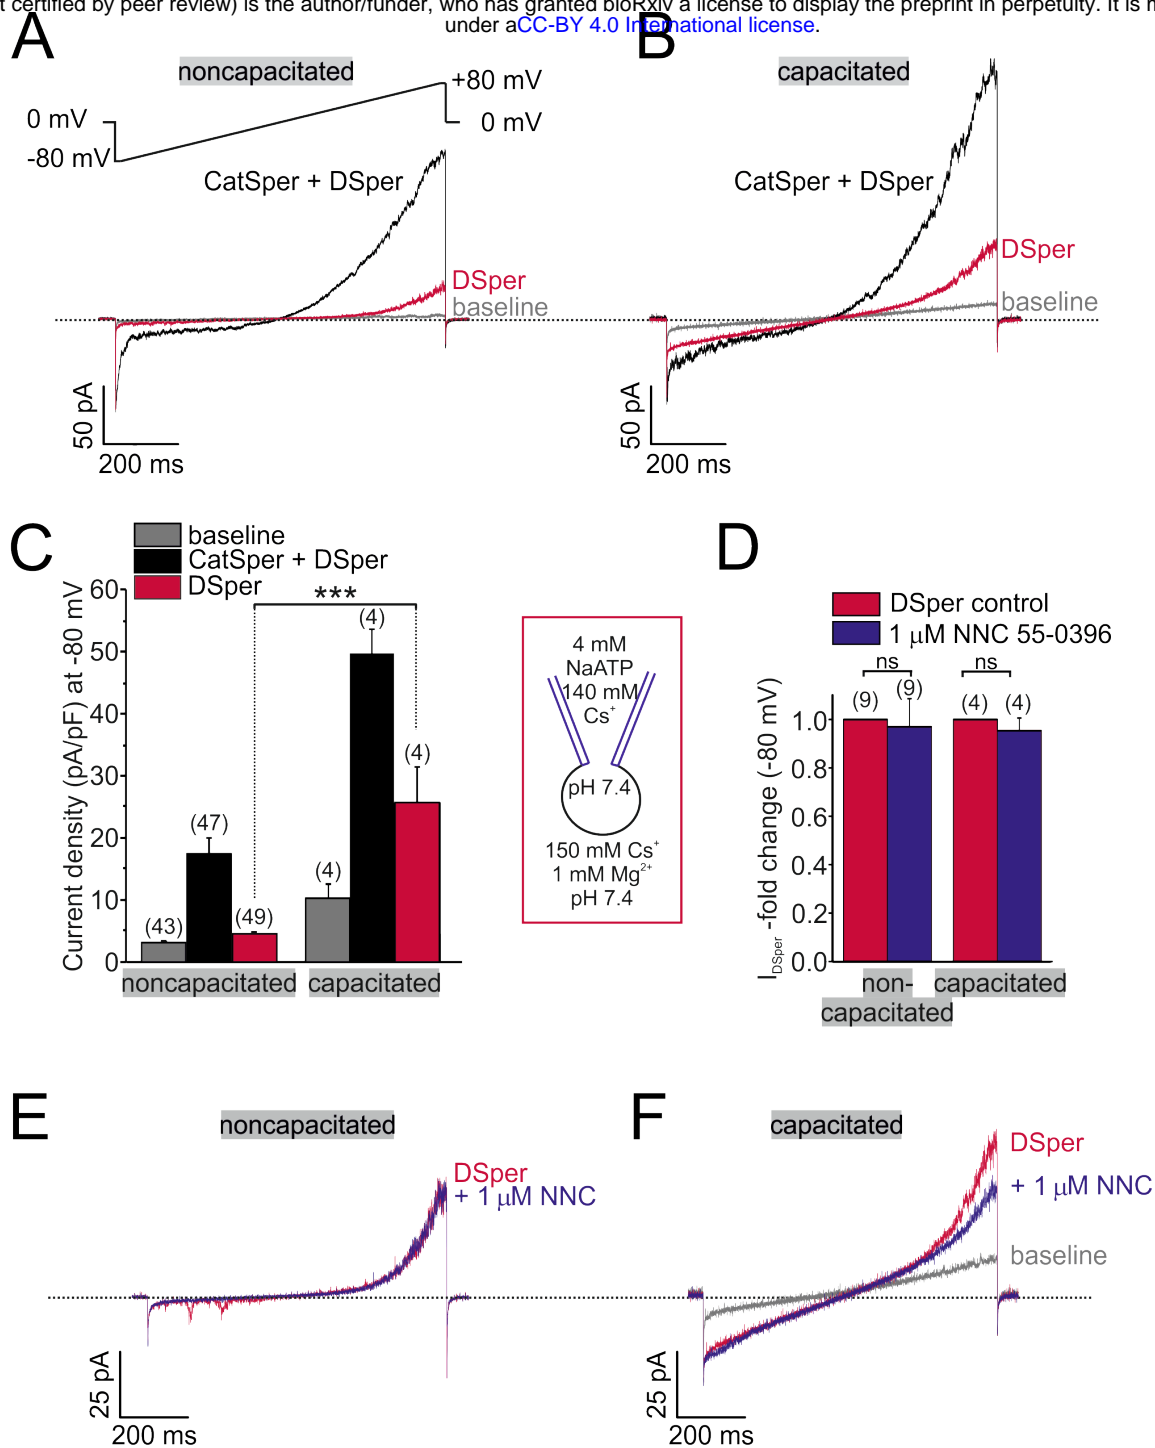

**Figure 1: Electrophysiological recordings reveal a novel non-CatSper conductance.** (A-B) Original current traces from representative whole-cell patch-clamp recordings from noncapacitated (A) and capacitated (B) human spermatozoa. Inward- and outward currents were elicited with voltage ramps as depicted in (A). Under divalent free conditions (black traces), typical CatSper monovalent caesium currents can be recorded. In presence of 1 mM Mg<sup>2+</sup> (red traces), an outward rectifying “DSper” current component remains. Hence, the black traces represent a mixture of both CatSper and DSpers monovalent Cs<sup>+</sup> currents, while the red traces show pure Cs<sup>+</sup> currents through DSpers. (C) Quantification of current densities for all three conditions in A-B. DSpers inward currents are potentiated upon capacitation (noncapacitated cells:  $-4.50 \pm 0.41$  pA/pF ( $n = 49$ ), capacitated cells:  $-25.58 \pm 5.88$  pA/pF ( $n = 4$ ). Statistical significance (unpaired t-test) was indicated by: \*\*\* $p \leq 0.001$ . No variation between human donors were noticed. Quantification of normalized DSpers inward currents (D) and original current traces (E-F) in presence and absence of the CatSper inhibitor NNC 55-0396 demonstrate the absence of inhibition.

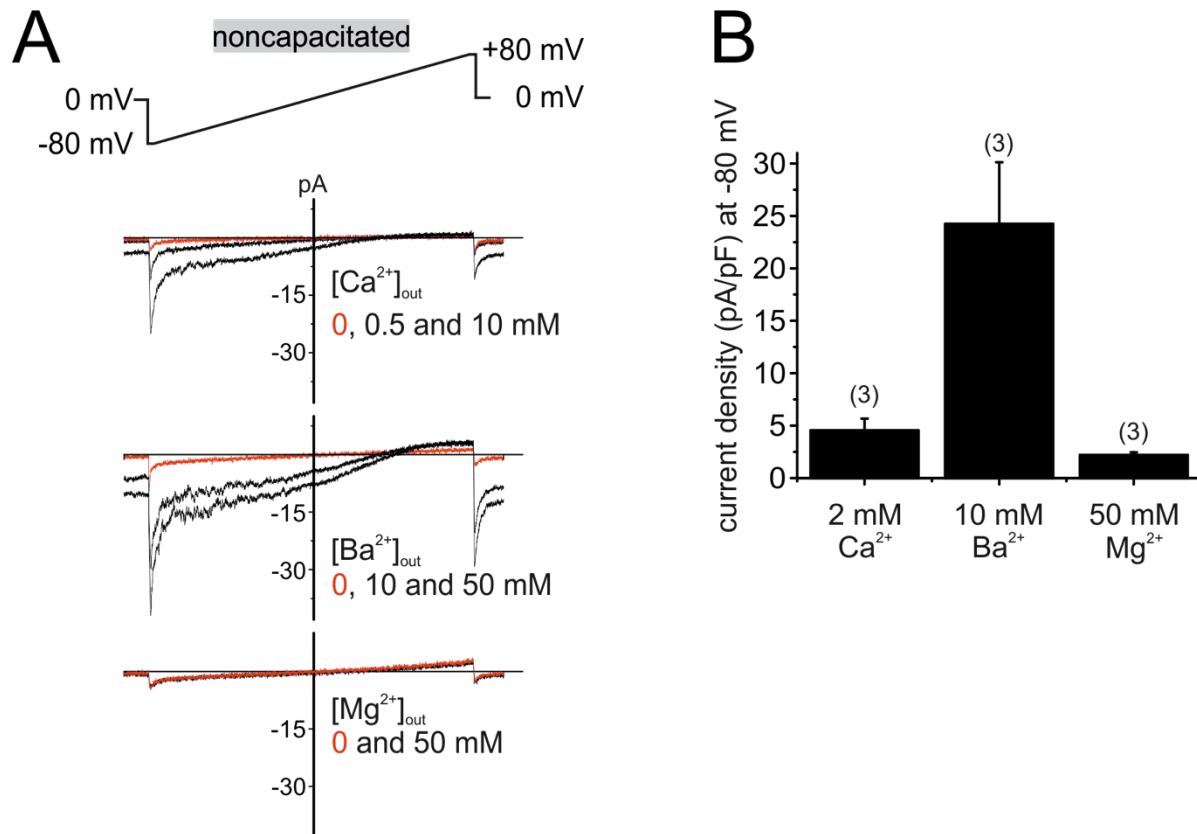

**Fig. 1 - Supplementary Figure 1: Human CatSper conducts  $Ca^{2+}$  and  $Ba^{2+}$ , but not  $Mg^{2+}$ .** (A) Original current traces from whole-cell voltage-clamp recordings of noncapacitated human spermatozoa. Inward- and outward currents were elicited with voltage ramps as depicted. Pipette solution was: 140 mM NMDG, 100 mM Hepes, 5 mM EGTA, 5 mM EDTA, 330 mosmol, pH 7.3, composition of bath solution was: 500 nM progesterone, 100 mM Hepes, 130 mM NMDG, plus X mM  $Ca^{2+}$ ,  $Ba^{2+}$  or  $Mg^{2+}$  as depicted, 317 mosmol, pH 7.4. When the major permeable extracellular cation was  $Ca^{2+}$  or  $Ba^{2+}$ , negative membrane potentials induced concentration-dependent inward currents. In the presence of  $Mg^{2+}$ , CatSper currents remained at baseline level (0 mM), indicating that human CatSper is not permeable for  $Mg^{2+}$ . (B) Quantification of current densities (pA/pF) for either  $Ca^{2+}$ ,  $Ba^{2+}$  or  $Mg^{2+}$  inward currents through CatSper.

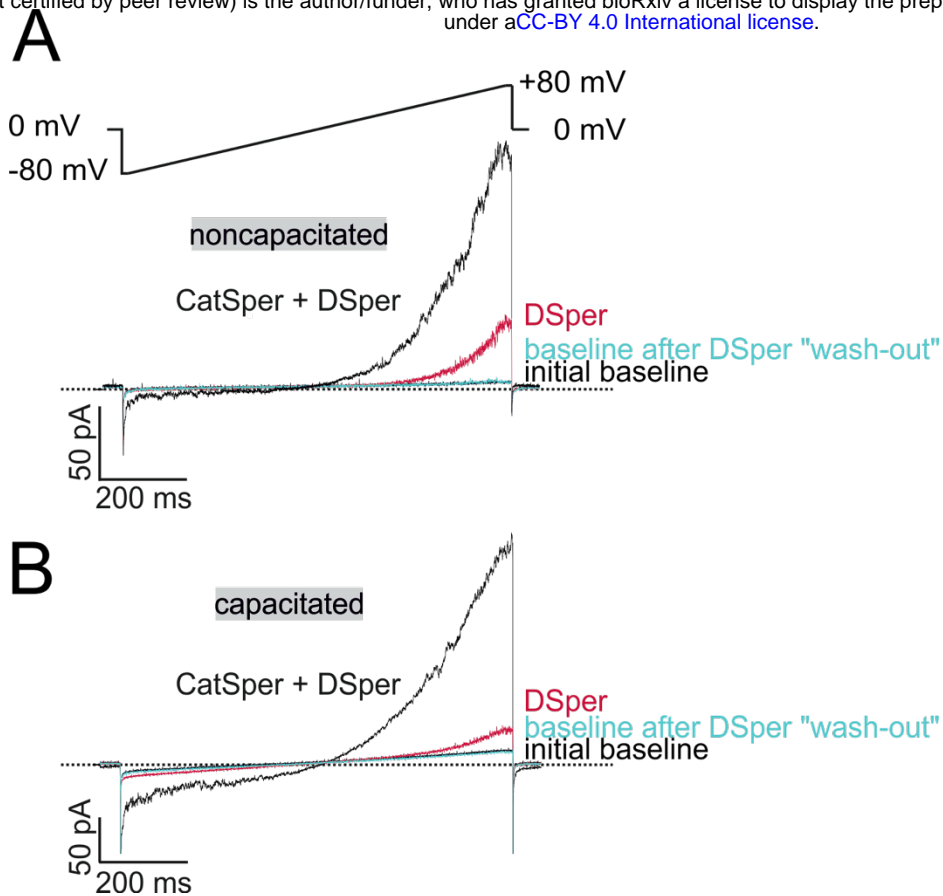

**Fig. 1 - Supplementary Figure 2: DSpers currents were recorded under stable conditions.** (A-B) Original current traces from representative whole-cell patch-clamp recordings of noncapacitated (A) and capacitated (B) human spermatozoa. Inward- and outward currents were elicited with voltage ramps as depicted in (A). Represented are three conditions – baseline (in HS solution), CatSper + DSpers currents and isolated DSpers currents. Whole-cell currents returned to their initial baseline level after returning to HS solution, indicating that the recorded DSpers currents are not a remnant of an increased leak-current.

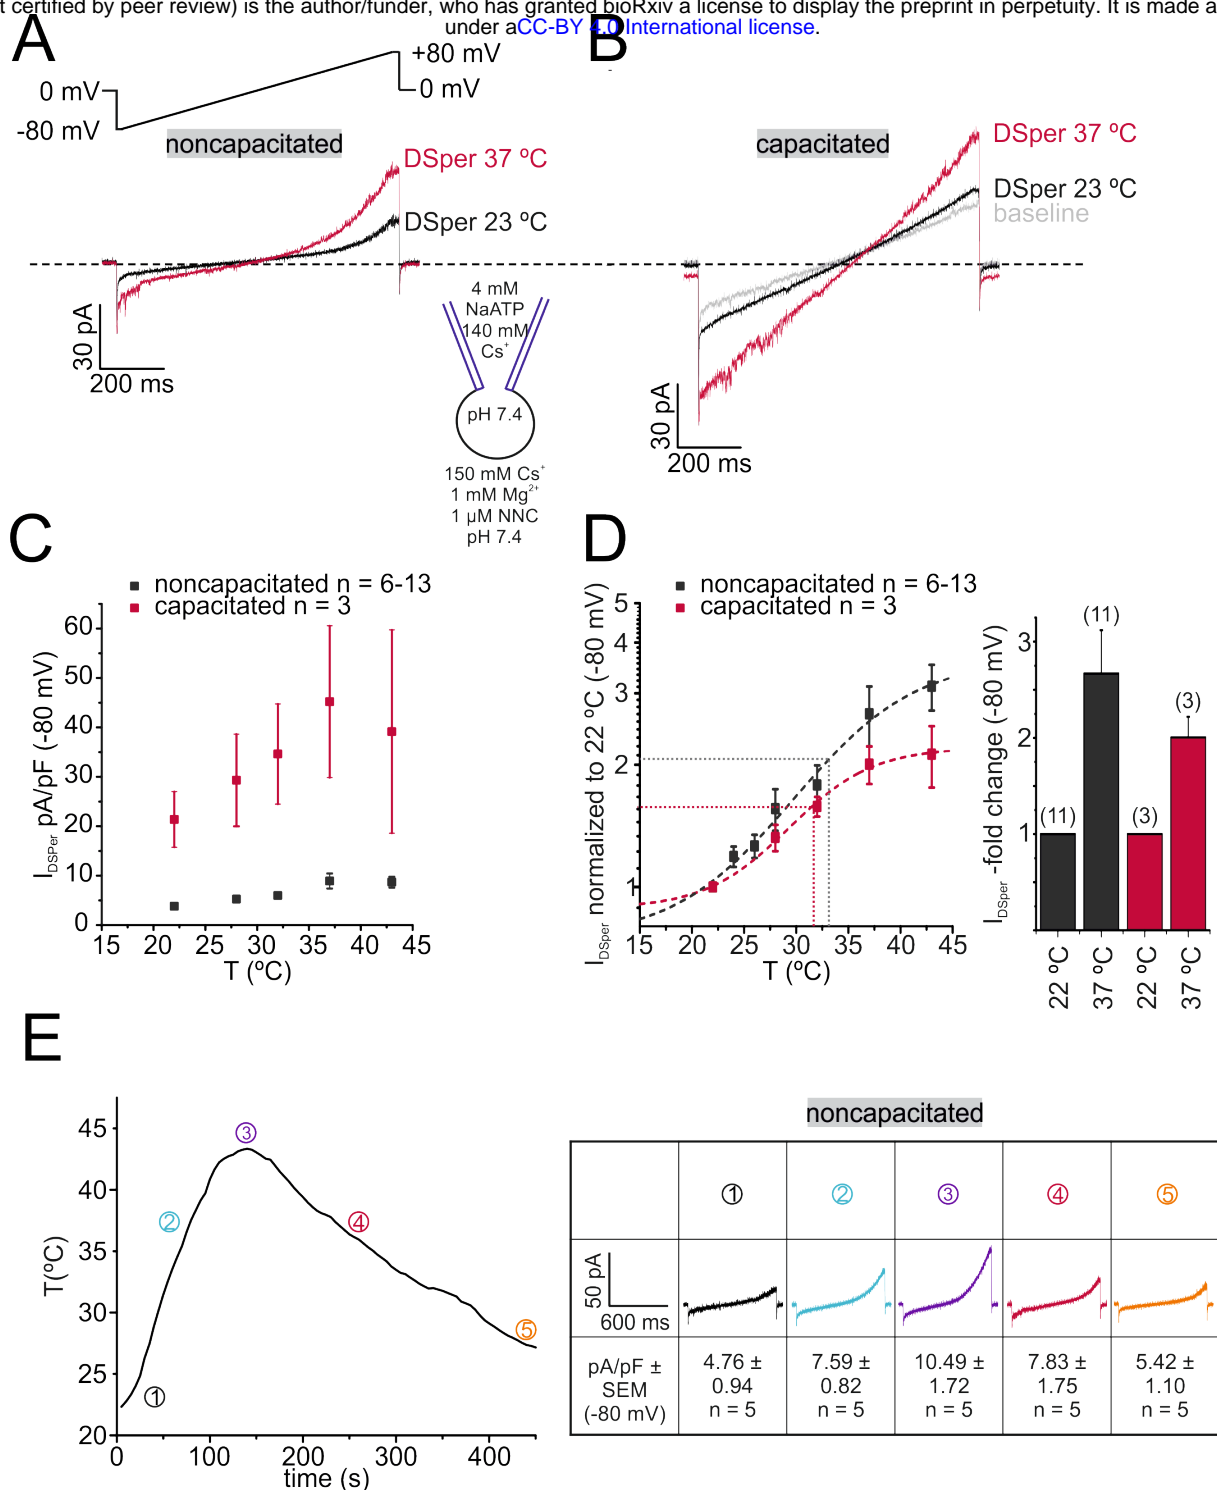

**Figure 2: DSper is activated by warm temperatures.** (A-B) Representative current traces from whole-cell patch-clamp recordings from noncapacitated (A) and capacitated (B) human spermatozoa challenged with a rise in temperature from 24 °C to 39 °C. Both DSper inward- and outward currents are increased at higher temperature. (C) Quantification of DSper inward current densities as a function of bath temperature (in °C). Noncapacitated (black squares) as well as capacitated cells (red squares) show increased current densities when stimulated with increasing bath temperatures. (D) Data of (C) normalized to room temperature (22 °C). Half maximal activation at  $T_{1/2} = 33^{\circ}\text{C}$  (noncapacitated) and  $T_{1/2} = 32^{\circ}\text{C}$  (capacitated) indicated by the dotted lines. (E) Mean applied bath temperatures as a function of time and corresponding DSper currents. Inset shows representative traces indicating that the temperature-induced potentiation effect was reversible.

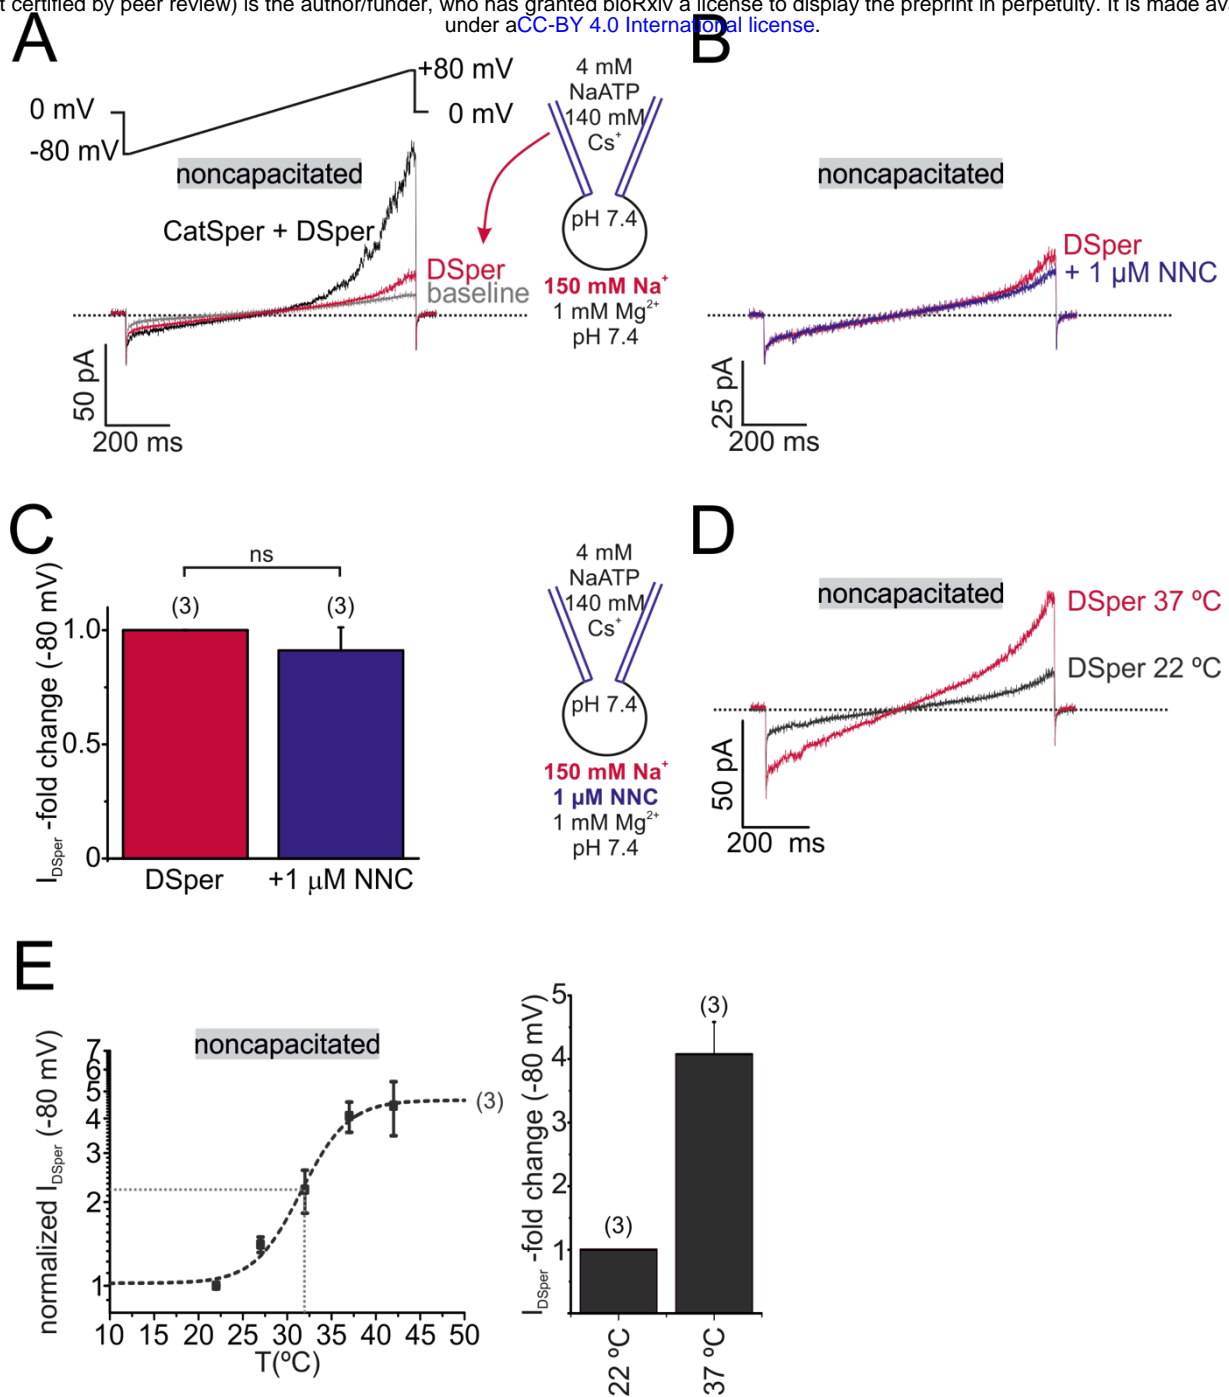

**Figure 3: DSper conducts sodium.** (A) Representative current traces from whole-cell patch-clamp recordings of noncapacitated human spermatozoa. Inward- and outward currents were elicited with voltage ramps as depicted. To record DSper currents, extracellular Cs<sup>+</sup> was substituted with the same concentration of sodium Na<sup>+</sup>. Representative current traces (B) and quantification of normalized DSper inward currents (C) before and after stimulation with 1 μM NNC suggest that CatSper does not contribute to the recorded sodium inward conductance. (D-E) Representative current traces in (D) and normalized inward currents (E) at increasing bath temperatures. A similar temperature-induced potentiation effect of DSper sodium inward currents can be described as for caesium currents. Half maximal activation was achieved at  $T_{1/2 \text{ sodium}} = 32^\circ\text{C}$  (dotted line).



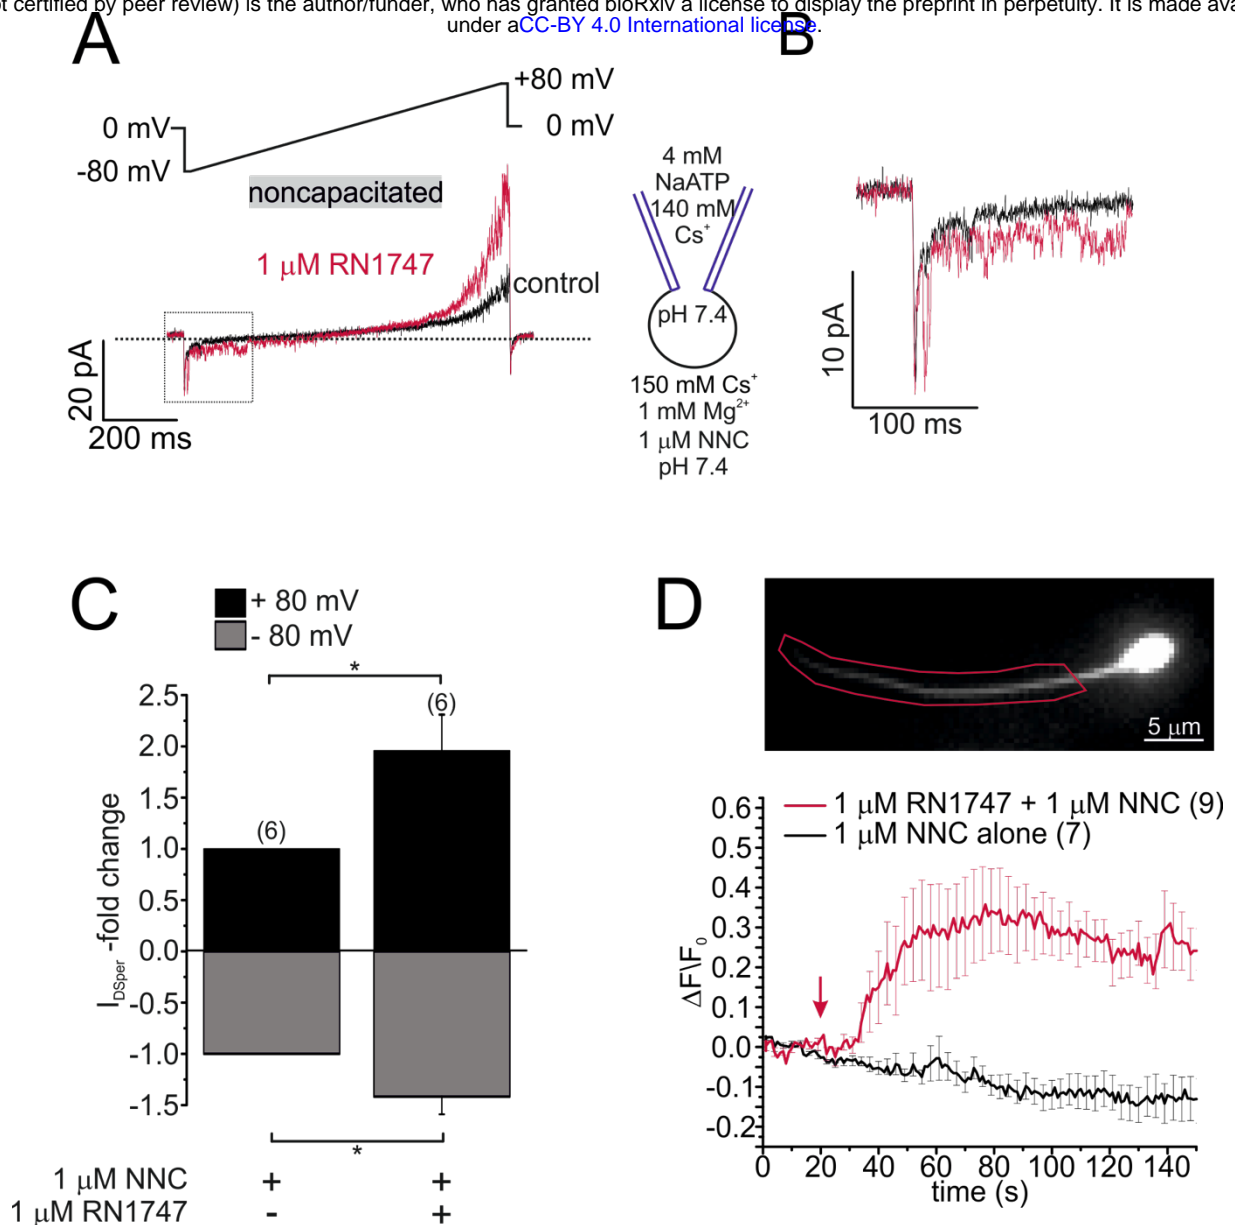

**Figure 4: DSper is activated by the TRPV4 agonist RN1747.** Original current traces from representative whole-cell patch-clamp recordings of noncapacitated human spermatozoa. Inward- and outward currents were elicited with voltage ramps as depicted. DSper monovalent caesium currents (black trace) are increased after stimulation with 1  $\mu\text{M}$  RN1747 (red trace). Both conditions in presence of 1  $\mu\text{M}$  NNC. (B) Inset of (A) emphasizes how the agonist RN1747 increases DSper's open probability. (C) Quantification of normalized DSper currents under control conditions and after stimulation with RN1747. Both inward and outward currents show a significant gain upon stimulation with the TRPV4 agonist (factor  $1.42 \pm 0.17$ ,  $p = 0.0298$  for inward currents, factor  $1.95 \pm 0.35$ ,  $p = 0.0209$  for outward currents, unpaired t-test,  $n = 6$ ). Statistical significance (unpaired t-test) was indicated by: \* $p \leq 0.05$ . No variation between human donors were noticed. (D) Noncapacitated spermatozoa were bulk loaded with the calcium indicator fluo-4/AM (top) and fluorescence changes restricted to the flagellar principal piece were analysed upon stimulation with RN1747 (red trace, bottom). Time point of agonist application is indicated by the arrow. In presence of the CatSper inhibitor NNC 55-0369 (and additional preincubation of at least 1 min before agonist application), RN1747 induced a noticeable rise in cytosolic calcium levels. This effect was absent when the cells were stimulated with NNC 55-0369 alone (black trace).

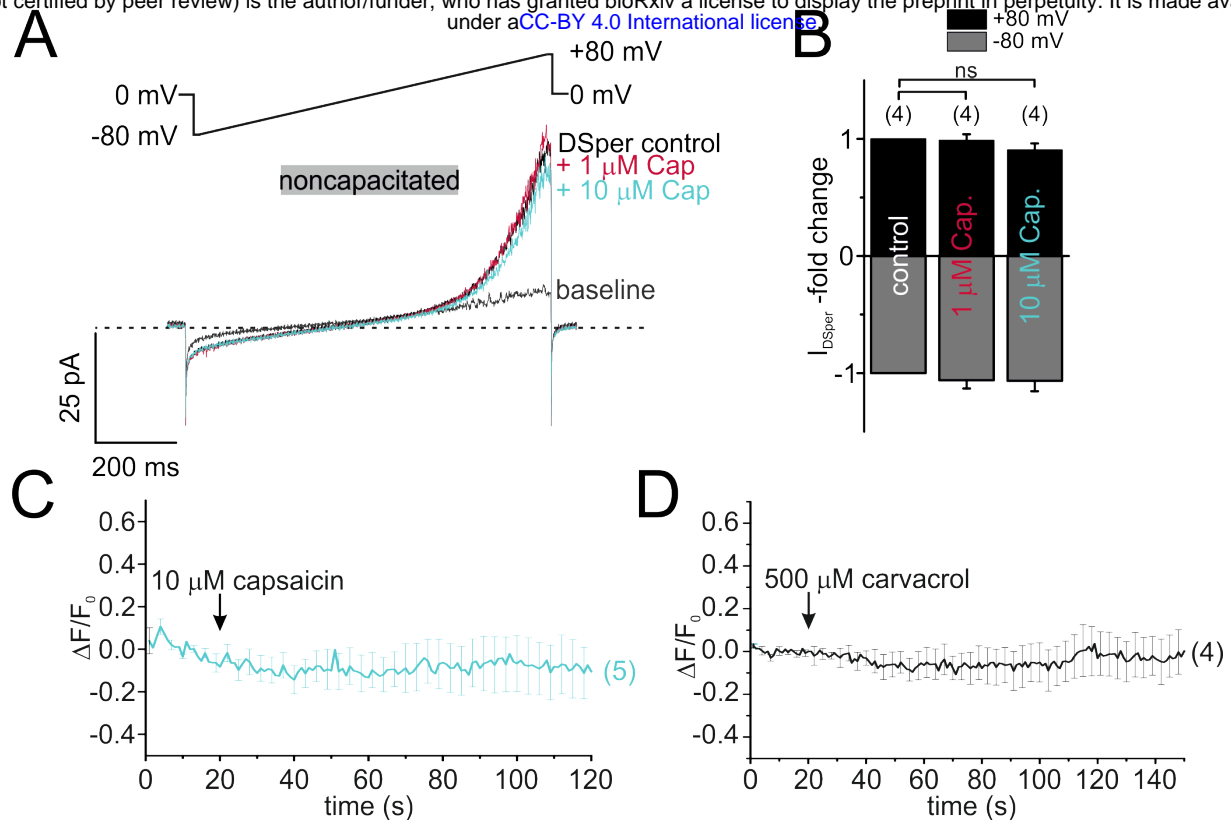

**Fig. 4 - Supplementary Figure 1: TRPV1 and TRPV3 is not functionally expressed in human spermatozoa.** (A) Original current traces from representative whole-cell patch-clamp recordings of noncapacitated human spermatozoa. Inward- and outward currents were elicited with voltage ramps as depicted. Stimulation with two different concentrations (1 and 10  $\mu\text{M}$ ) of the specific TRPV1 agonist capsaicin did not induce any significant effect on DSpers control inward or outward currents. Quantification of normalized DSpers currents w/ and w/o agonist in (B). (C) Single-cell calcium imaging results confirmed our electrophysiological findings. Application of 10  $\mu\text{M}$  capsaicin had no effect on cytosolic calcium levels. (D) Our Single-cell calcium imaging approach did not reveal any notable effect of the TRPV3 specific agonist carvacrol (500  $\mu\text{M}$ ).

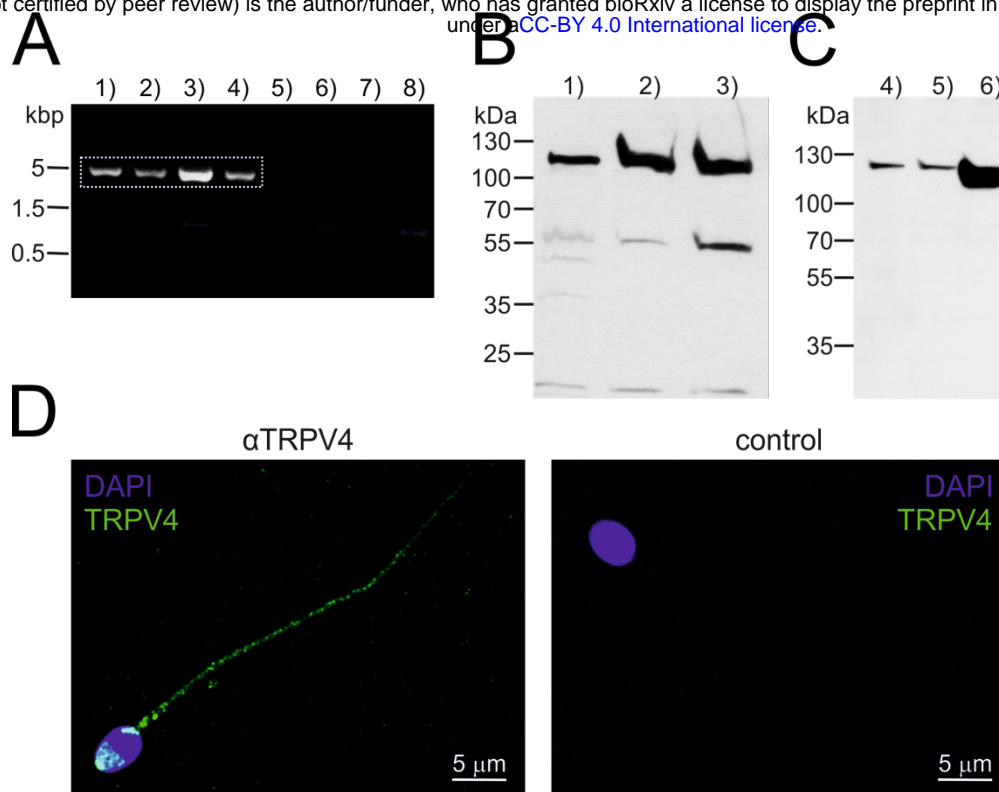

**Fig. 4 - Supplementary Figure 2: TRPV4 can be detected on protein and mRNA level.** (A) RT-PCR using a full-length TRPV4 primer pair, mRNA isolated from swim-up purified noncapacitated spermatozoa and PCR conditions as follows: 1) – 4) varying annealing temperatures (52-60 °C), 5) - 6) negative control in absence of the reverse transcriptase enzyme (Ta = 50 °C, 56 °C), 7) – 8) no template control (Ta = 56 °C). Dotted square marks bands that were selected for gene product sequencing. (B) Western blotting confirms the presence of the TRPV4 peptide in 1) human testicular tissue 2) capacitated and 3) noncapacitated spermatozoa. Immunopositive bands can be detected in all three samples at approx. 115 kDa. (C) TRPV4 was cloned from human sperm and recombinantly expressed in HEK293 cells. Western blotting results are shown for 4) nontransfected HEK293 cells, 5) cells transfected with the empty vector and 6) HEK293 cells transfected with the TRPV4-containing vector. An intense immunopositive band can be detected in line 6), at same height as in (B 1-3). Weak bands in 4) and 5) suggest endogenous expression of TRPV4 in HEK293 cells. (D) Confocal fluorescence images of immunostainings against TRPV4. (Left) noncapacitated spermatozoa were labeled with an anti-TRPV4 selective antibody and a Dylight488-conjugated secondary antibody. Nuclear dye DAPI locates the sperm head. Immunopositive fluorescent signal was detected in the sperm flagellum and the acrosome region. (Right) Negative control shows no unselective signal in the absence of the primary antibody, but in presence of the secondary.

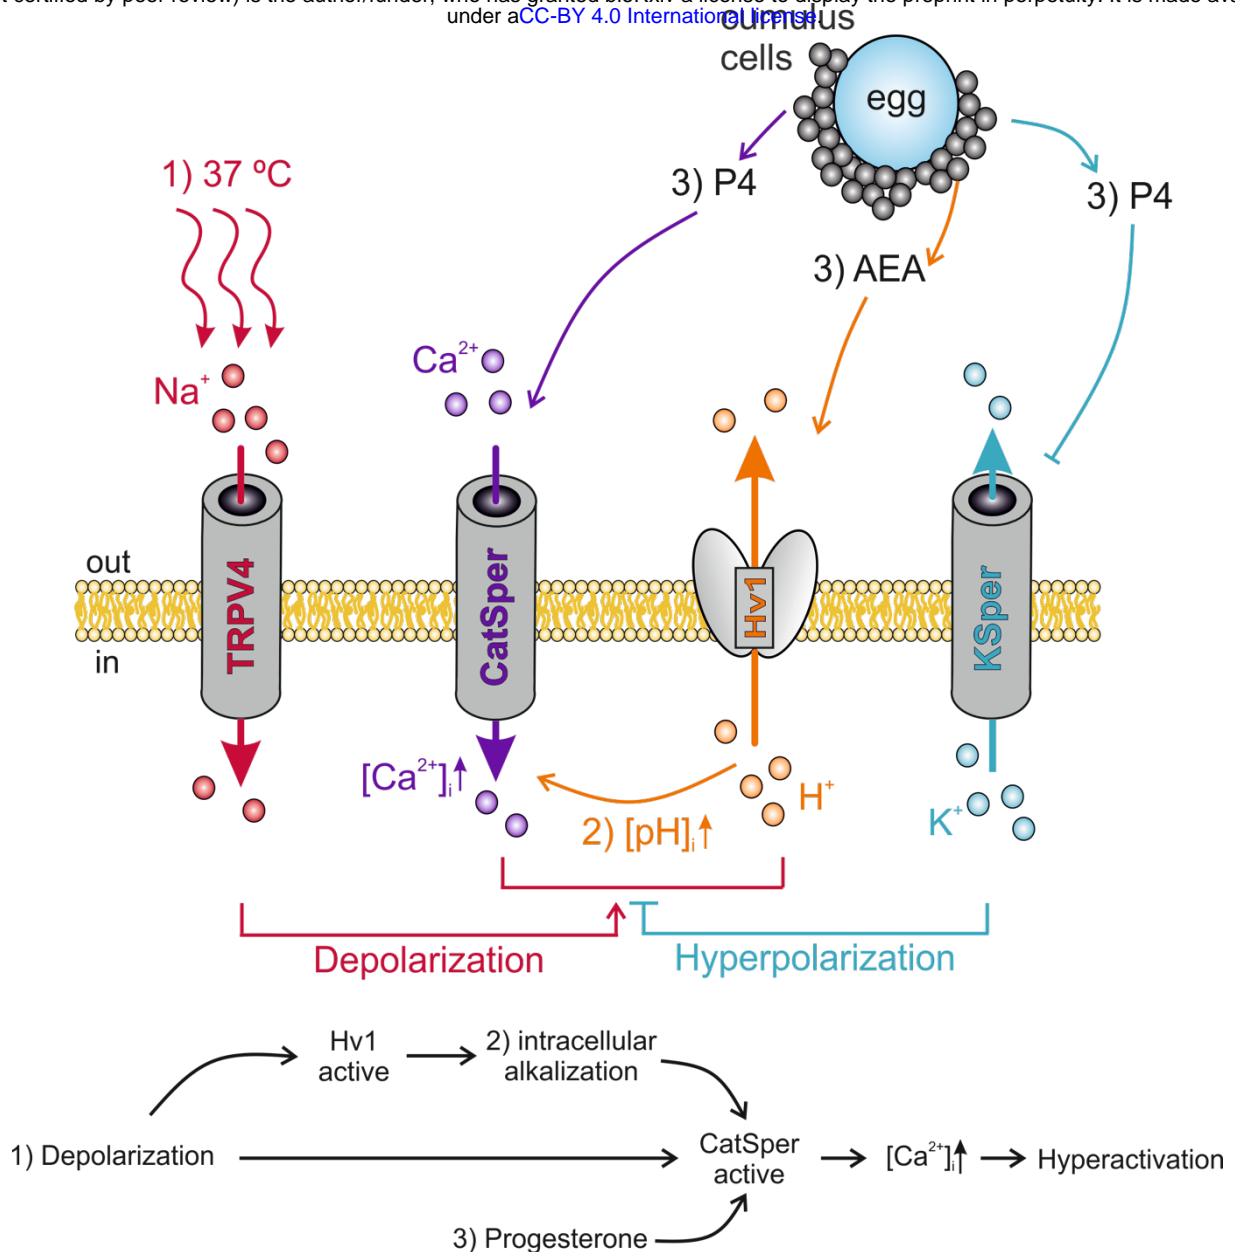

**Figure 5: Interdependency of ion channel complexes in the sperm flagellum.**

Transition into hyperactivated motility is triggered by a CatSper-mediated rise in cytosolic calcium levels. Proper CatSper function requires three concurrent activation mechanisms: 1) membrane depolarization, 2) intracellular alkalization via Hv1-mediated proton extrusion, and 3) abundance of progesterone. In our proposed model the sperm's sodium channel TRPV4 is activated by warm temperatures (37 °C at the site of fertilization). TRPV4-mediated sodium influx induces 1) membrane depolarization, which in turn activates both Hv1 and CatSper. Hv1 then extrudes protons out of the sperm, thereby leading to 2) intracellular alkalization and further activation of CatSper. Cumulus cells surrounding the egg secrete 3) P4 and AEA. P4 releases CatSper inhibition and blocks K<sub>Sper</sub>-mediated hyperactivation. AEA was shown to potentiate Hv1. The resulting opening of CatSper generates a Ca<sup>2+</sup> wave that serves as the trigger for hyperactivation.
